# Supplementary material for: Mucus-penetrating dendritic mesoporous silica nanoparticle loading drug nanocrystal clusters to enhance permeation and intestinal absorption
Source: Royal Society of Chemistry journal article supplement (doi:10.1039/d2bm01404a), 2022-12-08
Supplement: d2bm01404a1.pdf [file d2bm01404a1.pdf]

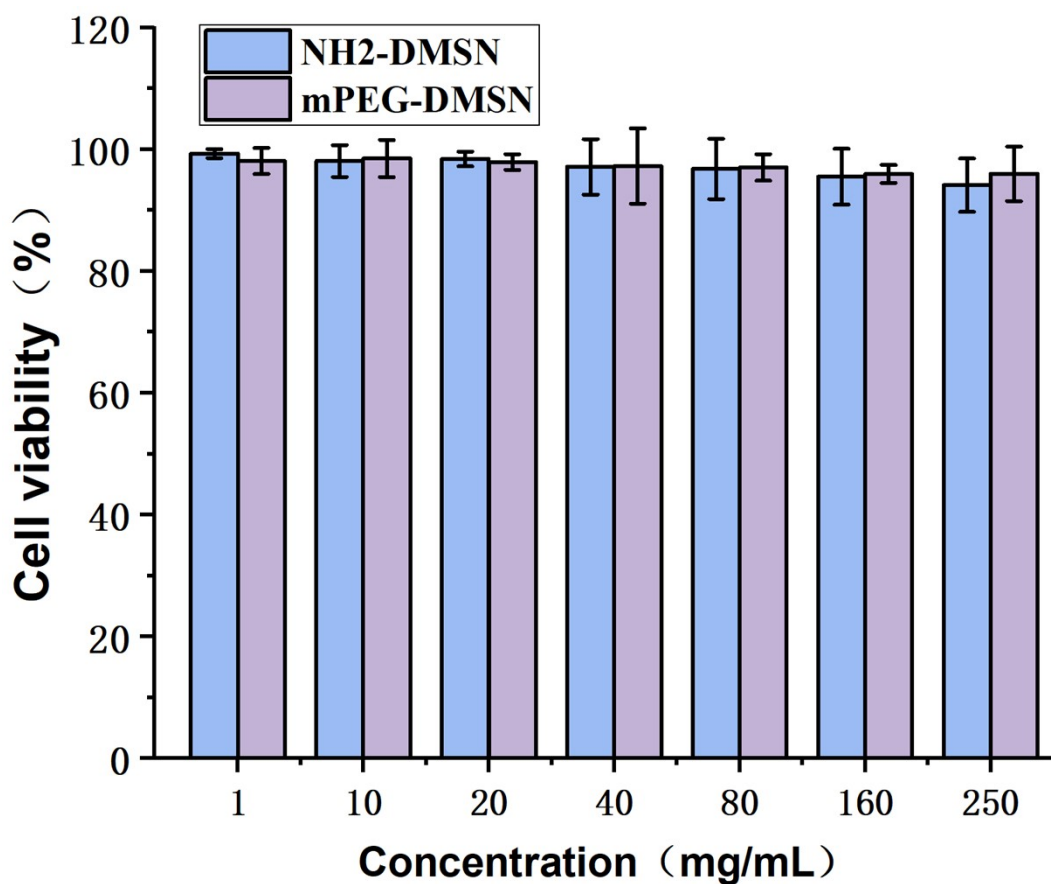

Figure S1 Cell viability of NH<sub>2</sub>-DMSN and mPEG-DMSN

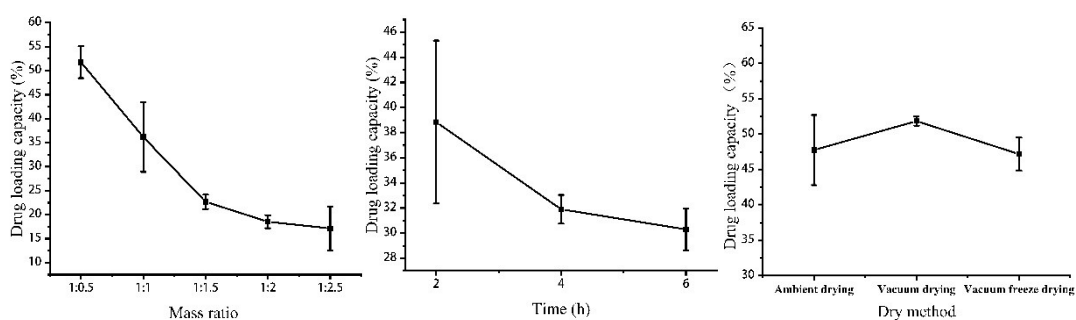

Figure S2. Examination of the preparation process of AG@mPEG-DMSN.

**Table S1. Effect of different groups on paw edema model in rats**

|                     | Control | Model  | low-dose raw<br>AG | high-dose raw<br>AG | low-dose<br>AG@mPEG-<br>DMSN | high-dose<br>AG@mPEG-<br>DMSN |
|---------------------|---------|--------|--------------------|---------------------|------------------------------|-------------------------------|
| Swelling degree (g) | 0.0008  | 0.0474 | 0.0466             | 0.0437              | 0.0327 <sup>\$\$**</sup>     | 0.0267 <sup>\$\$##</sup>      |

<sup>\$</sup>p<0.05, <sup>\$\$</sup>p<0.01 versus swelling degree with model group; \* p<0.05, \*\*p<0.01 versus swelling degree with low-dose raw AG group; # p<0.05, ##p<0.01 versus swelling degree with high-dose raw AG
